# Supplementary material for: A 3D structure C/Si/ZnCo2O4/CC anode for flexible lithium-ion batteries with high capacity and fast charging ability
Source: Royal Society of Chemistry journal article supplement (doi:10.1039/d2nr04213d), 2022-01-01
Supplement: d2nr04213d1.pdf [file d2nr04213d1.pdf]

## Supplementary Information

### **A 3D structure C/Si/ZnCo<sub>2</sub>O<sub>4</sub>/CC anode for flexible lithium-ion batteries with high capacity and fast charging ability**

Shuangpeng Li,<sup>†</sup> Huang Xiao,<sup>†</sup> Jiaying Zhou,<sup>†</sup> Chenyu Zhao, Yi Yuan, Xiaohong Xia,<sup>\*</sup> Yuwen Bao,<sup>\*</sup> Manon Lourenço, Kevin Homewood, Yun Gao<sup>\*</sup>

Ministry-of-Education Key Laboratory for the Green Preparation and Application of Functional Materials, Collaborative Innovation Center for Advanced Organic Chemical Materials Co-constructed by the Province and Ministry, School of Materials Science & Engineering, Hubei University, Wuhan 430062, China

<sup>\*</sup>Corresponding author

E-mail address: xhxia@hubu.edu.cn (X. Xia), baoyw@hubu.edu.cn (Y. Bao), gaoyun@hubu.edu.cn (Y. Gao).

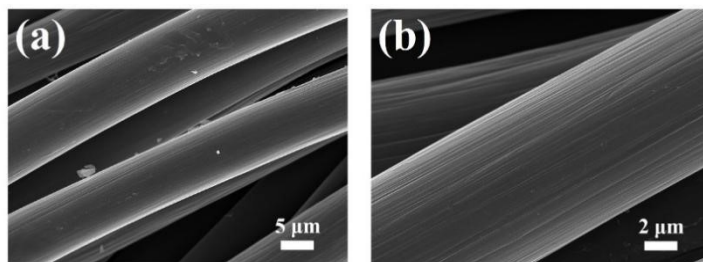

Figure S1. FESEM images of CC current collector.

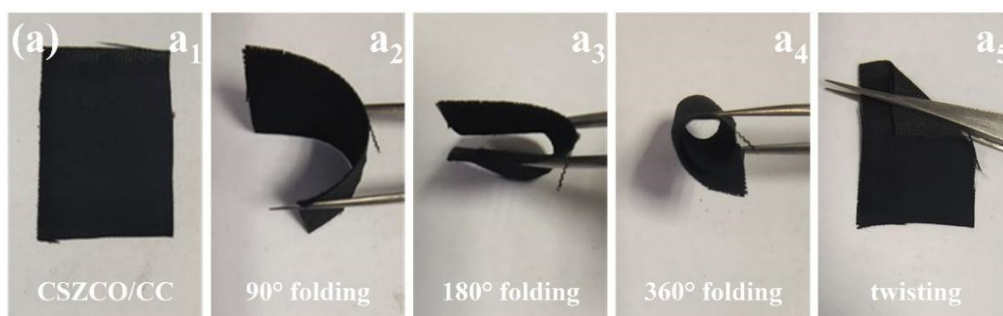

Fig. S2. (a) Digital images of CSZCO/CC at 90° folding, 180° folding, 360° folding, and twisting.

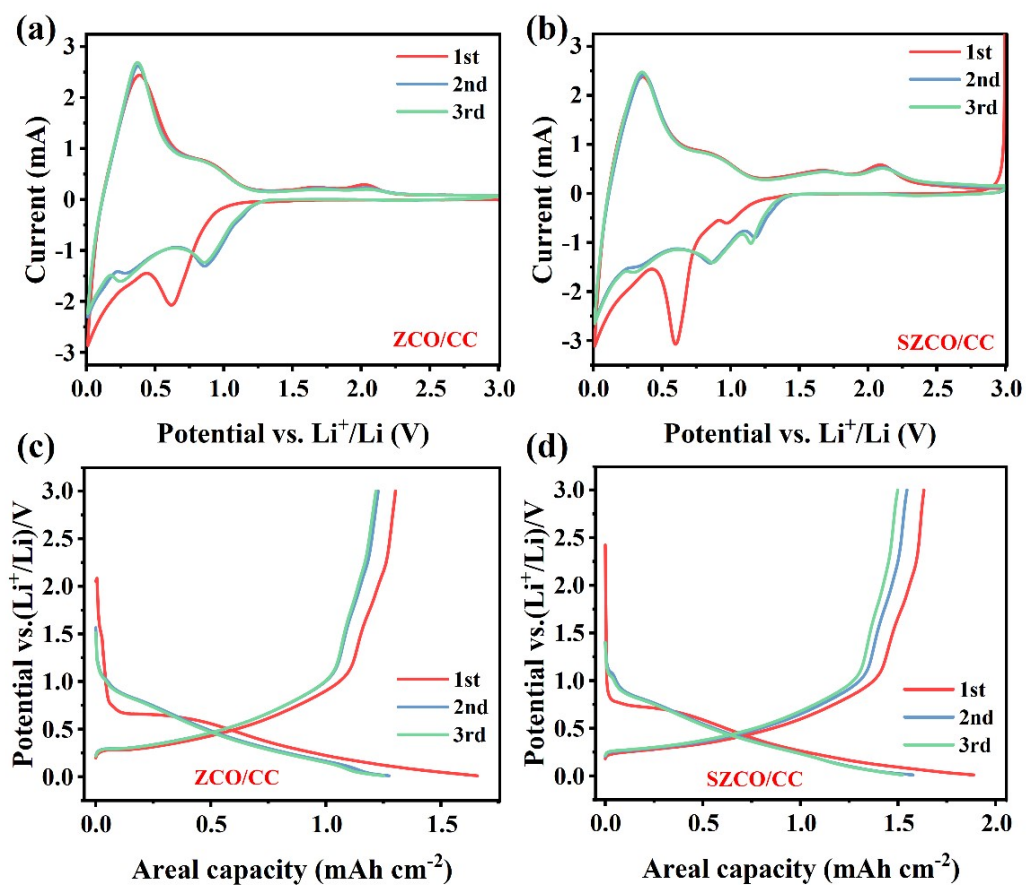

---

**Fig. S3.** CV curves of (a) ZCO/CC and (b) SZCO/CC. GCD curves of (c) ZCO/CC and (d) SZCO/CC at 2 mA cm<sup>-2</sup>.

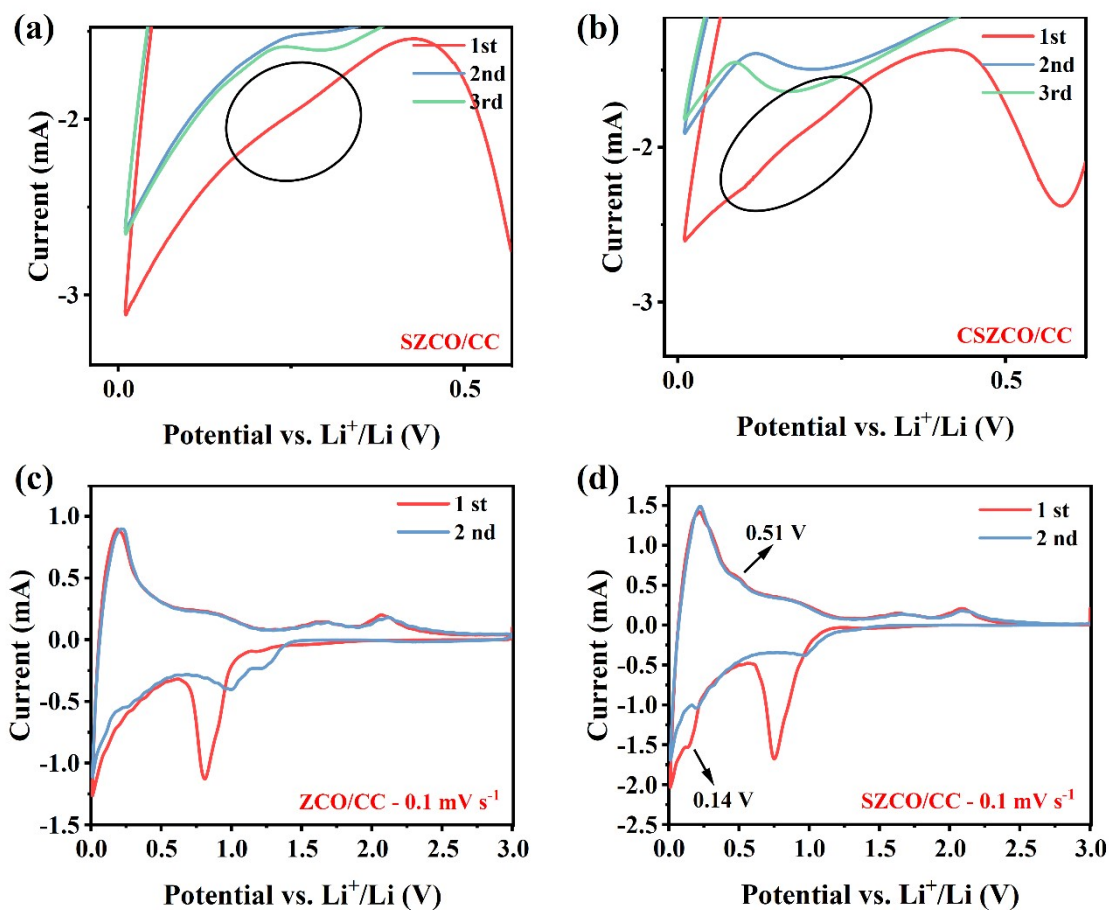

**Fig. S4.** Locally magnified CV curves of (a) SZCO/CC and (b) CSZCO/CC at a scan rate of  $0.2 \text{ mV s}^{-1}$ . CV curves of (c) ZCO/CC and (d) SZCO/CC at a scan rate of  $0.1 \text{ mV s}^{-1}$ .

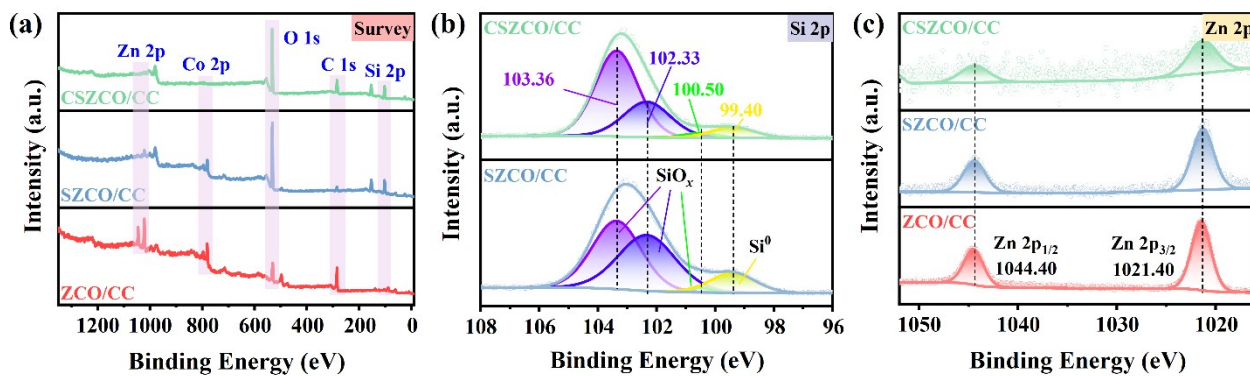

**Fig. S5.** XPS spectra of (a) survey, (b) Si 2p, and (c) Zn 2p.

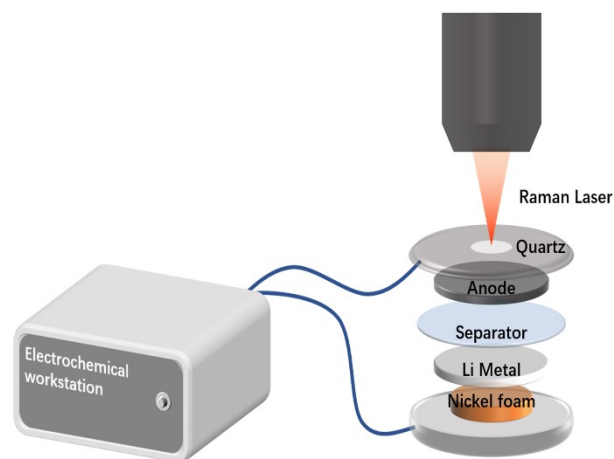

**Fig. S6.** Diagram of in-situ Raman test.

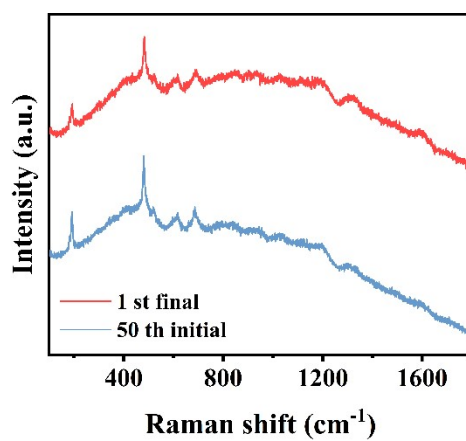

**Fig. S7.** Raman spectra of CSZCO/CC after charge in the 1<sup>st</sup> cycle and before discharge in the 50<sup>th</sup> cycle.

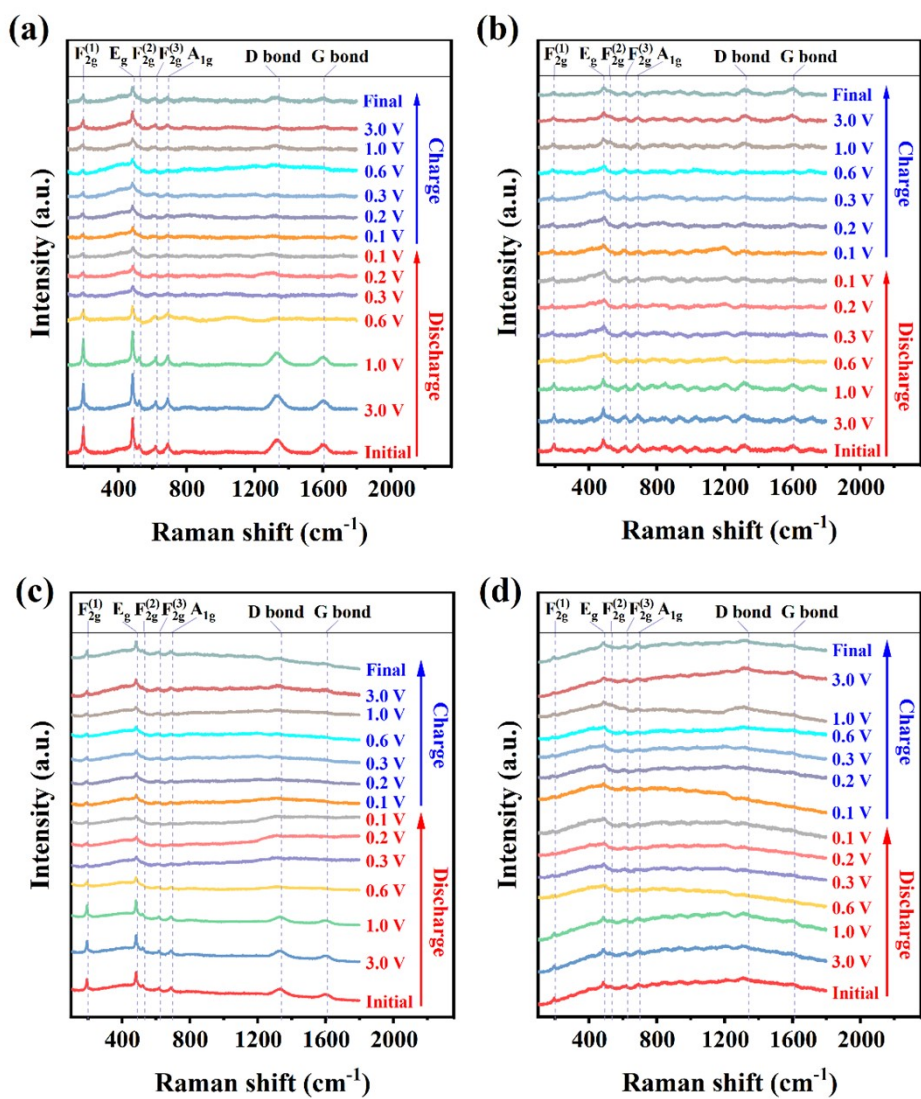

**Fig. S8.** In-situ Raman spectra of ZCO/CC (a) 1<sup>st</sup> and (b) 50<sup>th</sup>, of SCZO/CC (c) 1<sup>st</sup> and (d) 50<sup>th</sup> from 100 to 1800  $\text{cm}^{-1}$ .

|                                                                    | CC<br>(~12.8 mg) | ZCO/CC<br>(~1.2 mg)                | SZCO/CC<br>(~1.4 mg)               | CSZCO/CC<br>(~1.5 mg)              |
|--------------------------------------------------------------------|------------------|------------------------------------|------------------------------------|------------------------------------|
| Areal capacity<br>(mAh cm <sup>-2</sup> at 5 mA cm <sup>-2</sup> ) | 0.37             | 0.63<br>(593 mAh g <sup>-1</sup> ) | 0.86<br>(694 mAh g <sup>-1</sup> ) | 1.16<br>(874 mAh g <sup>-1</sup> ) |

**Table S1.** The Areal capacity of puer CC, ZCO/CC, SZCO/CC, and CSZCO/CC at 5 mA cm<sup>-2</sup>.

For example, the ZCO/CC electrode had a areal capacity of 0.63 mAh cm<sup>-2</sup> after 500 cycles at a current density of 5 mA cm<sup>-2</sup>, and the CC electrode had a areal capacity of 0.37 mAh cm<sup>-2</sup>.

So, the capacity contribution of the CC electrode was  $0.37/0.63 = 59\%$ .
